# Supplementary material for: The effects of meteorological parameters and diffusive barrier reuse on the sampling rate of a passive air sampler for gaseous mercury
Source: Copernicus journal article supplement (doi:10.5194/amt-2017-73), 2017-05-02
Supplement: Supplementary file 1 [file amt-2017-73-supplement.pdf]

Supplementary Information for

**The effects of meteorological parameters and diffusive barrier reuse on the sampling rate of a passive air sampler for gaseous mercury**

McLagan, D. S.,<sup>1</sup> Mitchell, C. P. J.,<sup>1</sup> Huang, H.Y.,<sup>1</sup> Abdul Hussain, B.,<sup>1</sup> Lei, Y. D.,<sup>1</sup> Wania, F.<sup>1,\*</sup>

<sup>1</sup> Department of Physical and Environmental Sciences, University of Toronto Scarborough, 1065 Military Trail, M1C 1A4, Toronto, Ontario, Canada

\* Corresponding Author – email: [frank.wania@utoronto.ca](mailto:frank.wania@utoronto.ca); phone: +1 416-287-7225

## S1: Wind speed experimental Setup

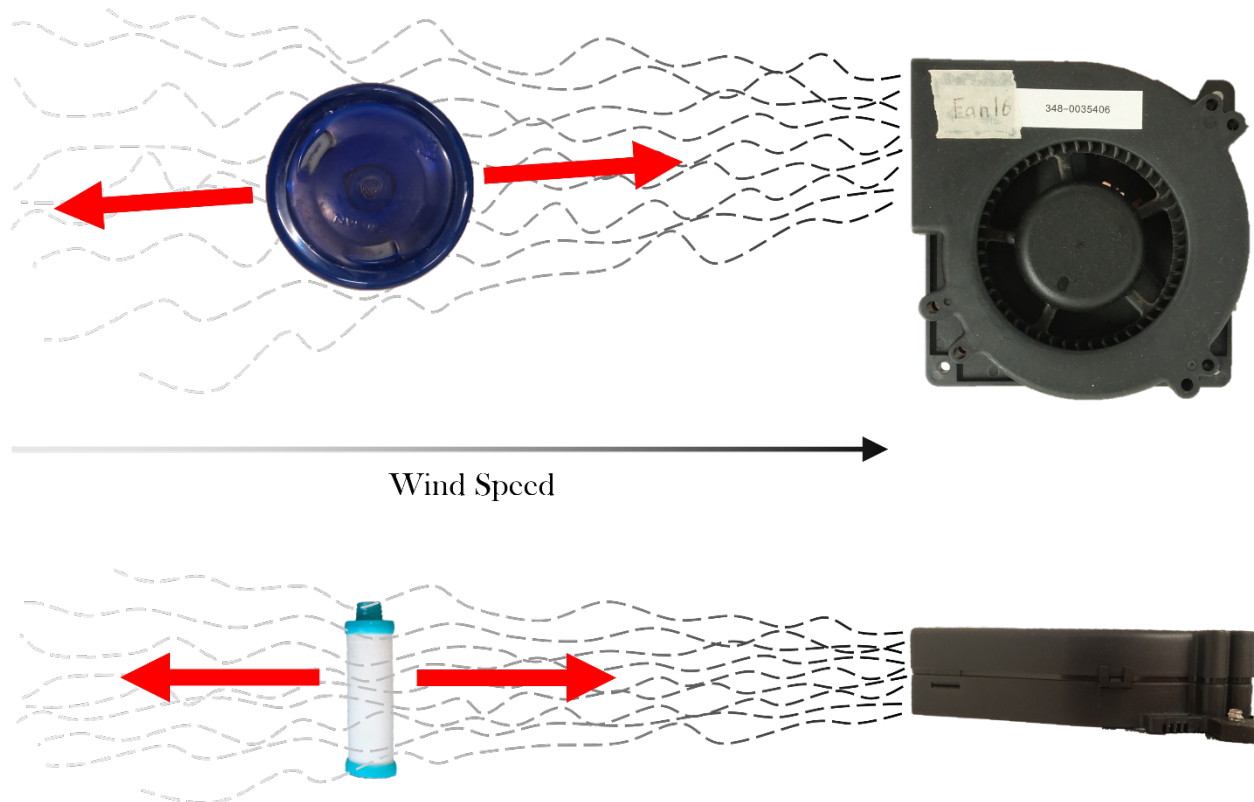

**Figure S1:** Graphical representations of the experimental setup used to study the impact of wind speed on the sampling rate of the passive air sampler (PAS). An overhead view of the PAS with protective shield is shown on the top and a side-on view of the PAS without protective shield below. A previous detailed mapping of the wind field generated by the fans revealed greater wind speed closer to the fan (Zhang et al., 2013). Therefore wind speed can be adjusted by varying the distance between PAS and the fans. Wind speeds were recorded at the front of each individual PAS (with the PAS removed) before and after each deployment for 5 minutes.

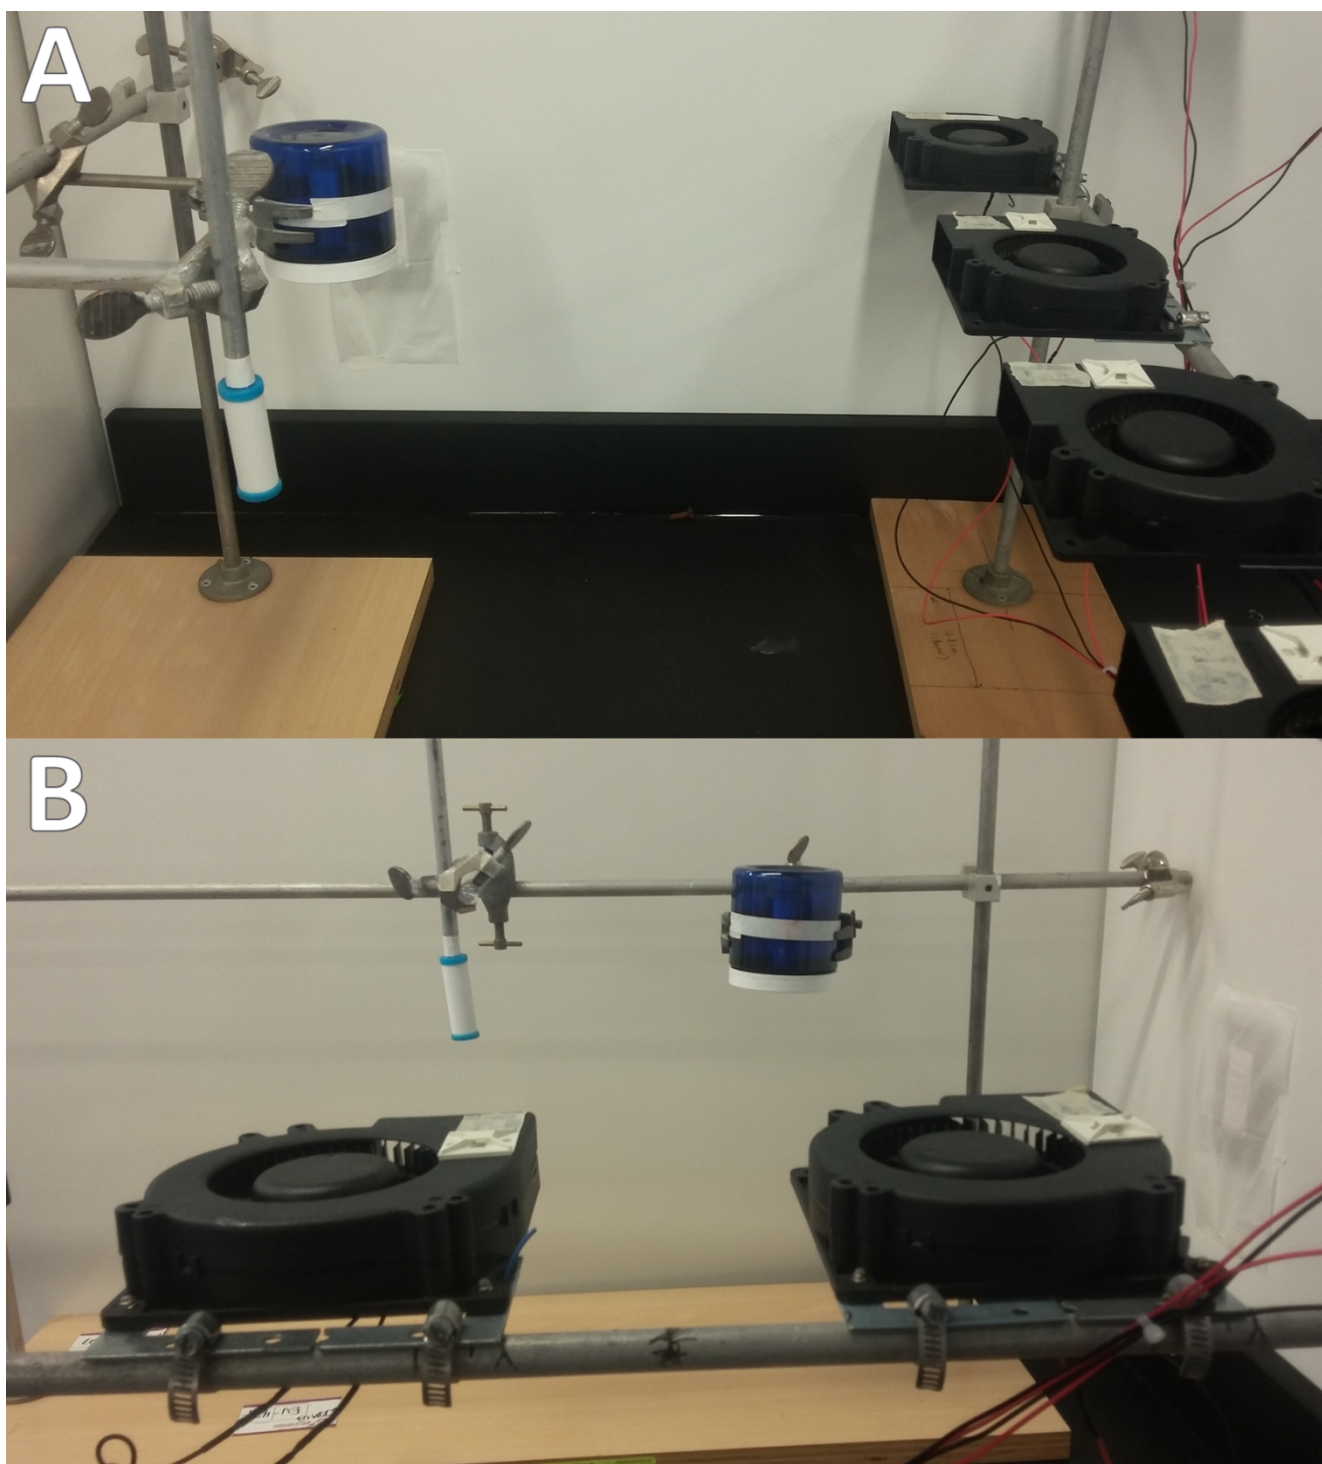

**Figure S2:** Images of PAS setup for wind experiments. Changes in windspeed were achieved by adjusting boss head and clamps allowing movement in X, Y, and Z spatial dimensions on retort stands. Panel A: Side view of experimental setup with electronic fans and Config. 1 (white Radiello, with protective shield; right) and Config. 2 (white Radiello, without protective shield; left) PASs. Panel B: Rear view of experimental setup.

## S2: Dust coating of Radiellos® and corresponding sorbed mercury for each sampler in Radiello® reuse experiment

**Table S1:** Indoor experiment on the variability of Hg uptake in previously deployed Radiellos. Mass of sorbed mercury (ng) and visually assessed extent of dust coating of the Radiellos prior to different cleaning treatments (scale: 0 – new, 1 – very low, 2 – low, 3 – moderate, 4 – high, and 5 – very high).

| Replicate | New       |              | Uncleaned |              | Physical  |              | Soap      |              | Acid      |              | Heat-acid |              | Memory    |              |
|-----------|-----------|--------------|-----------|--------------|-----------|--------------|-----------|--------------|-----------|--------------|-----------|--------------|-----------|--------------|
|           | Sorbed Hg | Dust coating |
| A         | 23.7      | 0            | 23.3      | 2            | 14.4      | 5            | 22.1      | 3            | 22.1      | 4            | 21.9      | 1            | 23.4      | 3            |
| B         | 18.4      | 0            | 22.5      | 4            | 22.7      | 1            | 21.4      | 2            | 23.6      | 4            | 23.0      | 3            | 24.7      | 3            |
| C         | 18.5      | 0            | 9.0       | 5            | 19.2      | 2            | 18.1      | 1            | 23.9      | 5            | 19.9      | 2            | 18.1      | 3            |
| D         | 19.2      | 0            | 17.9      | 1            | 18.0      | 2            | 19.3      | 2            | 19.2      | 4            | 17.0      | 3            | 18.8      | 3            |
| E         | 23.3      | 0            | 16.6      | 3            | 17.9      | 3            | 18.7      | 4            | 18.9      | 2            | 21.2      | 4            | 20.2      | 3            |
| Avg.      | 20.6      | 0.0          | 17.9      | 3.0          | 18.4      | 2.6          | 19.9      | 2.4          | 21.5      | 3.8          | 20.6      | 2.6          | 21.0      | 3.0          |
| SD        | 2.7       |              | 5.7       |              | 3.0       |              | 1.7       |              | 2.4       |              | 2.3       |              | 2.9       |              |
| RSD       | 13%       |              | 32%       |              | 16%       |              | 9%        |              | 11%       |              | 11%       |              | 14%       |              |

**Table S2:** Outdoor experiment on the variability of Hg uptake in previously deployed Radiellos. Mass of sorbed mercury (ng) and visually assessed extent of dust coating of the Radiellos prior to cleaning (scale: 0 – new, 1 – very low, 2 – low, 3 – moderate, 4 – high, and 5 – very high).

| Replicate | New       |              | Uncleaned |              | Soap      |              |
|-----------|-----------|--------------|-----------|--------------|-----------|--------------|
|           | Sorbed Hg | Dust coating | Sorbed Hg | Dust coating | Sorbed Hg | Dust coating |
| A         | 7.4       | 0            | 6.7       | 5            | 7.3       | 5            |
| B         | 7.4       | 0            | 7.4       | 4            | 7.7       | 5            |
| C         | 7.5       | 0            | 7.0       | 5            | 7.4       | 4            |
| D         | 7.7       | 0            | 7.2       | 4            | 7.5       | 4            |
| E         | 7.1       | 0            | 7.9       | 4            | 7.3       | 5            |
| Avg.      | 7.4       | 0.0          | 7.3       | 4.4          | 7.5       | 4.6          |
| SD        | 0.2       |              | 0.5       |              | 0.2       |              |
| RSD       | 3%        |              | 6%        |              | 2%        |              |

### S3: Effect of deployment time on sampling rate for wind speed experiments

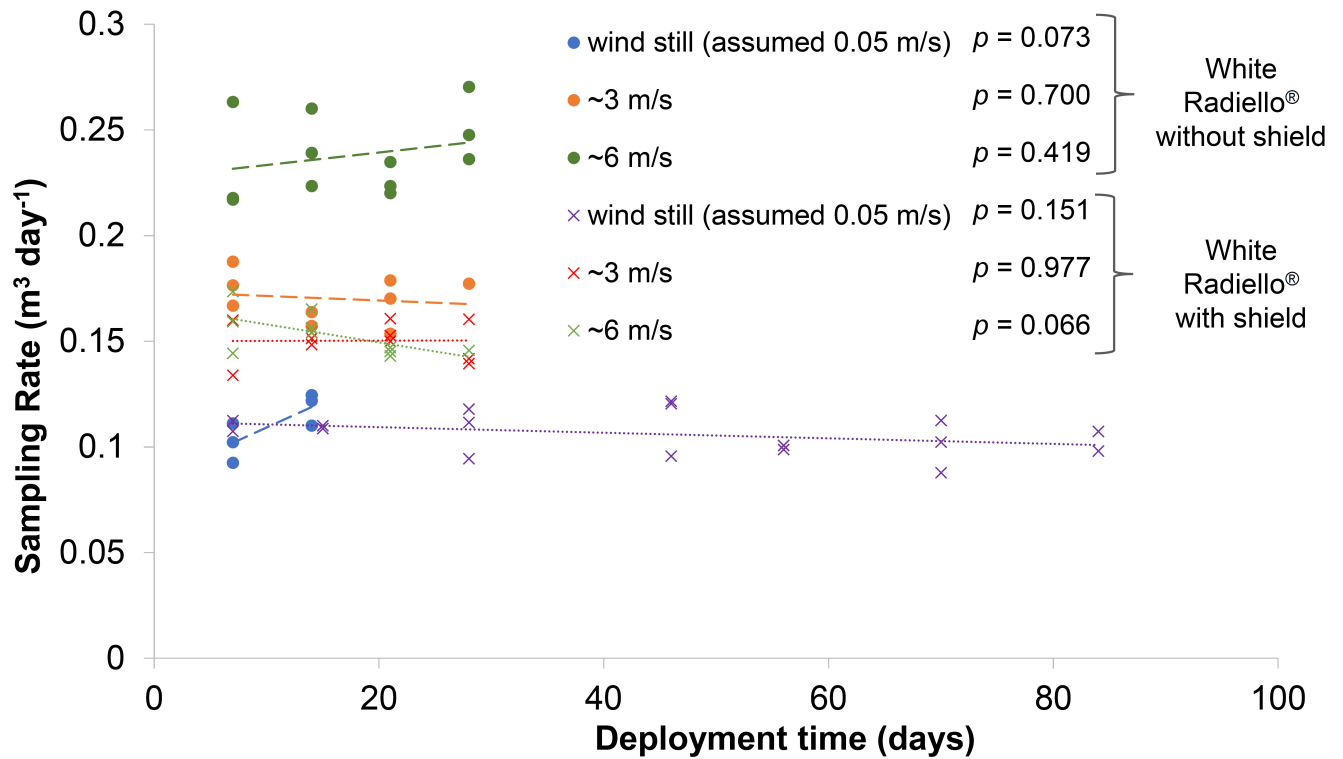

**Figure S3:** Uptake experiments: Sampling rate (SR) after different deployment times for PAS configuration 1 and 2 (white Radiello®, with and without protective shield, respectively) deployed at wind still (assumed  $0.05 \text{ m s}^{-1}$ ) conditions and at wind speeds of  $\sim 3 \text{ m s}^{-1}$  and  $\sim 6 \text{ m s}^{-1}$ . In none of these experiments did the SR vary significantly with deployment time.

**S4: Uptake curve for indoor uptake and calibration experiment using white Radiello® with protective shield**

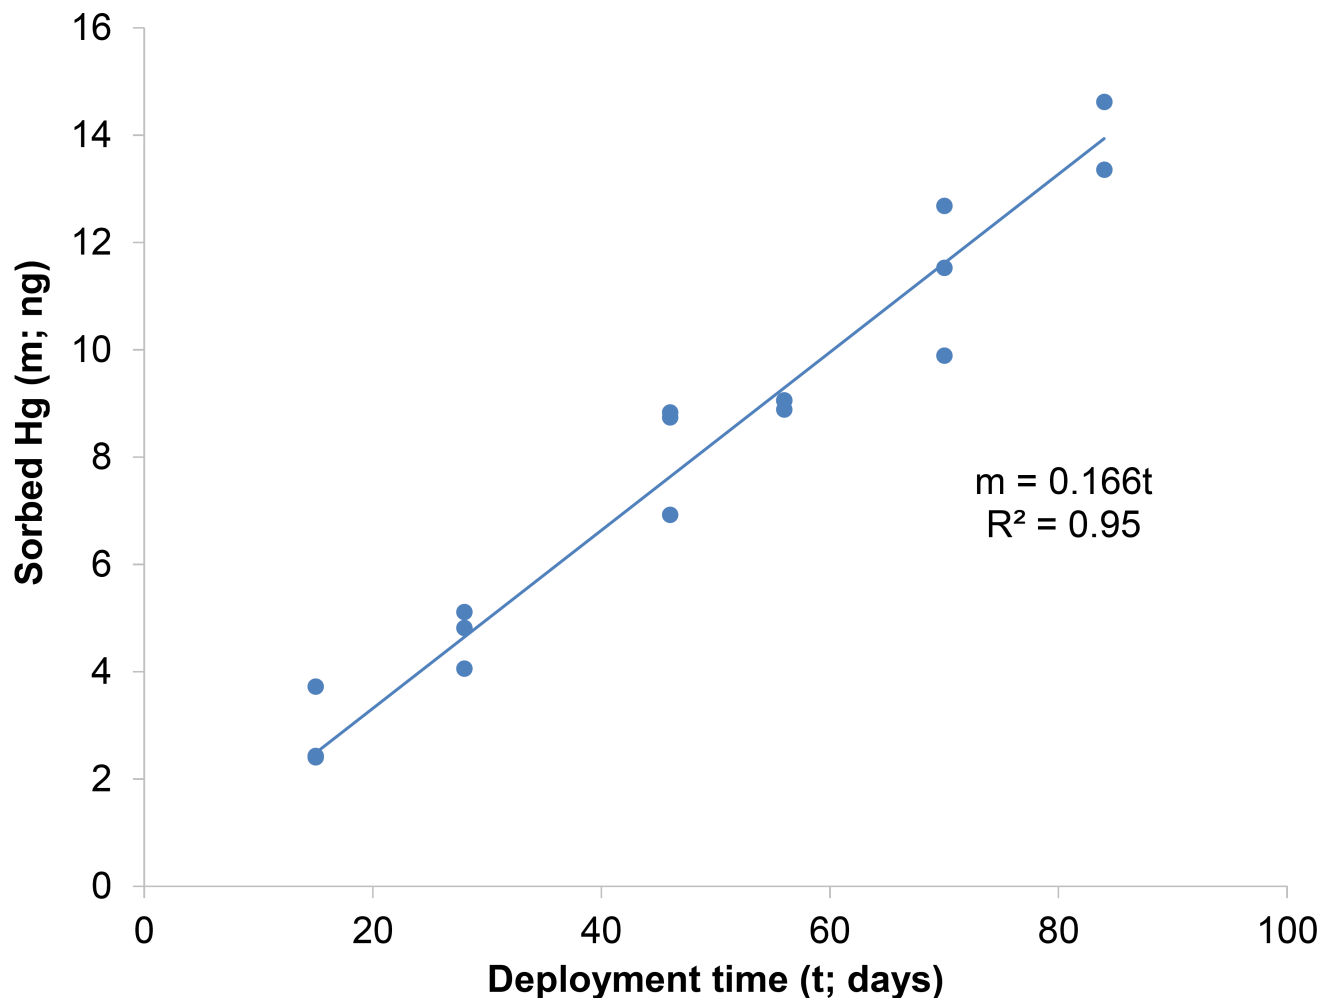

**Figure S4:** Uptake curve for indoor experiment at wind still conditions using standard configuration PAS (white Radiello® with protective shield). The mean gaseous Hg concentration measured by the Tekran 2537A was  $1.63 \pm 0.15 \text{ ng m}^{-3}$ .

### S5: Effect of relative humidity on sampling rate

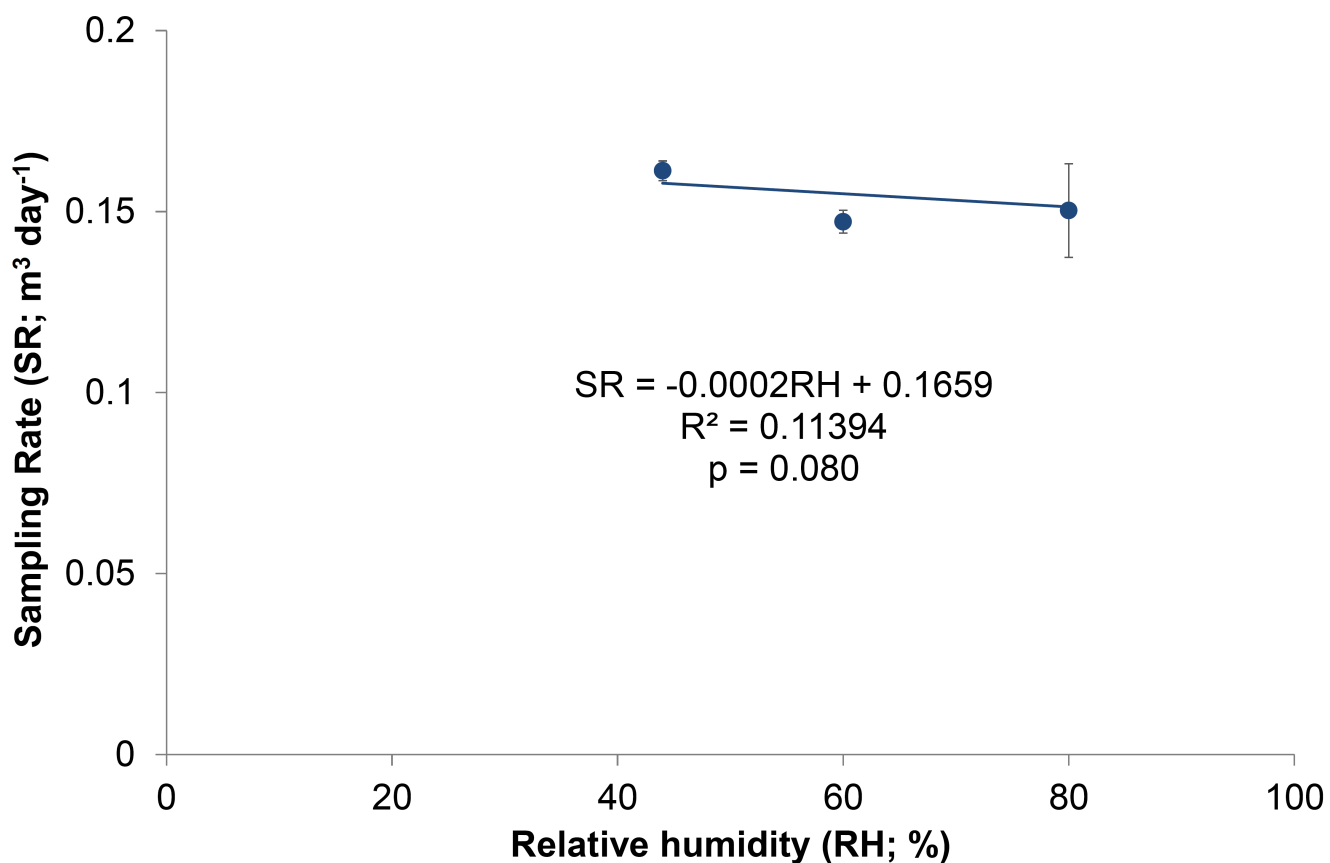

**Figure S5:** Effect of relative humidity (RH) on SR of the passive air sampler for gaseous mercury as determined in chamber experiments. Temperature was held constant at 20°C throughout the experiments and wind speeds ranged between 1.1 and 2.3 m s<sup>-1</sup> when measured over two minute intervals at the position of the samplers both before and after the experiments. No significant effect of RH on SR was observed for the range of 44 – 80% ( $p = 0.080$ ).

## S5: Effect size using Cohen’s d value for Radiello® reuse experiments

Effect size describes the strength of an effect between two variables. One measure of effect size is Cohen’s d, which essentially provides a standardized method for differentiating two means, while also factoring in variance, without the involvement of traditional binary hypotheses testing (Cohen, 1988). Applying Cohen’s d test to the cleaning treatments there is very little difference (small or no diff.) between the *new* and the three cleaning treatments of *soap*, *acid*, and *heat-acid*, while the difference to *uncleaned* and *physical* treatments were greater (medium; Table 2).

**Table S3:** Pairwise comparison table of Cohen’s d value for sorbed mercury for each cleaning treatment. Lower comparison contains the effect magnitude ranges based on descriptors from Cohen.37 We use: no diff. < 0.2 < small < 0.5 < medium < 0.8 < large.

|                  | <i>new</i> | <i>uncleaned</i> | <i>physical</i> | <i>soap</i> | <i>acid</i> | <i>heat-acid</i> |
|------------------|------------|------------------|-----------------|-------------|-------------|------------------|
| <i>new</i>       | -          | 0.616            | 0.777           | 0.314       | 0.362       | 0.008            |
| <i>uncleaned</i> | medium     | -                | 0.119           | 0.482       | 0.836       | 0.625            |
| <i>physical</i>  | medium     | no diff.         | -               | 0.609       | 1.152       | 0.815            |
| <i>soap</i>      | small      | small            | medium          | -           | 0.778       | 0.336            |
| <i>acid</i>      | small      | large            | large           | medium      | -           | 0.399            |
| <i>heat-acid</i> | no diff.   | medium           | large           | small       | small       | -                |

Results of Cohen’s d test for effect size showed no difference ( $d = 0.167$ ) between *new* and *soap*, a small difference between *uncleaned* and *new* ( $d = 0.475$ ), and a medium difference between *uncleaned* and *soap* ( $d = 0.598$ ) treatments according to the effect magnitude.



## S6: Theoretical sampling rate adjustment equation

$$SR_{adj} = SR_{cal} + (T_{exp} - T_{cal}) * F_T + (WS_{exp} - WS_{cal}) * F_{WS}$$

Where:  $SR_{cal}$  – is the outdoor calibrated sampling rate ( $0.121\text{m}^3 \text{ day}^{-1}$ )

$T_{cal}$  – is the mean temperature from the outdoor calibration experiment ( $7.6^\circ\text{C}$ )

$WS_{cal}$  – is the mean wind speed from the outdoor calibration experiment ( $1.89 \text{ m s}^{-1}$ )

$F_T$  – is the adjustment factor for temperature ( $0.0009 \text{ per K}$ )

$F_{WS}$  – is the adjustment factor for wind speed ( $0.003 \text{ per m s}^{-1}$ )

$SR_{adj}$  – is the adjusted sampling rate for the experiment

$T_{exp}$  – is the measured mean temperature of the experiment

$WS_{exp}$  – is the measured mean wind speed of the experiment

### Example sampling rate adjustment:

Lets say the mean measured temperature and wind speed of an experiment are  $25.4^\circ\text{C}$  and  $1.5 \text{ m s}^{-1}$ :

$$SR_{adj} = SR_{cal} + (T_{exp} - T_{cal}) * F_T + (WS_{exp} - WS_{cal}) * F_{WS}$$

$$SR_{adj} = 0.121 + (25.4 - 7.6) * 0.0009 + (1.5 - 1.89) * 0.003$$

$$SR_{adj} = 0.121 + 0.0160 + (-0.0012)$$

$$SR_{adj} = 0.136 \text{ m}^3 \text{ day}^{-1}$$

## REFERENCES

Cohen, J.: Statistical power analysis for the behavioural sciences, 2nd ed., Lawrence Erlbaum Associates, Hillsdale, USA, 1988.

Zhang, X., Brown, T. N., Ansari, A., Yeun, B., Kitaoka, K., Kondo, A., Lei, Y. D., and Wania, F.: Effect of wind on the chemical uptake kinetics of a passive air sampler, *Environ. Sci. Technol.*, 47, 7868-7875, 2013.
